# Supplementary material
Source: HighWire-hosted journal article supplement (https://jnm.snmjournals.org/highwire/filestream/95515/field_highwire_adjunct_files/0/222604_Supplemental_Data.pdf)
Supplement: 222604_Supplemental_Data.pdf [file 222604_Supplemental_Data.pdf]

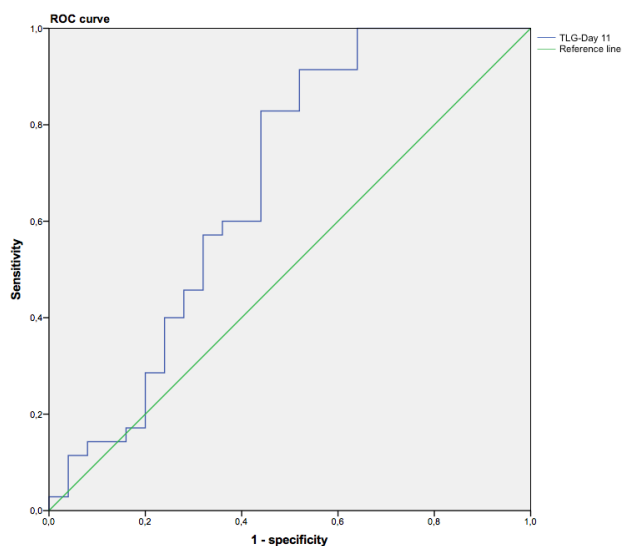

**Supplemental Figure 1** ROC curve for TLG Day 11. The curve shows the accuracy of using TLG Day 11 (AUC 0.68, 95% CI 0.53-0.82;  $p=0.021$ ) for predicting pathological tumor complete response (TRG1 vs TRG2-4). The optimal cut-off value was a TLG Day 11 of 42.3% (82.9% sensitivity, 56% specificity).

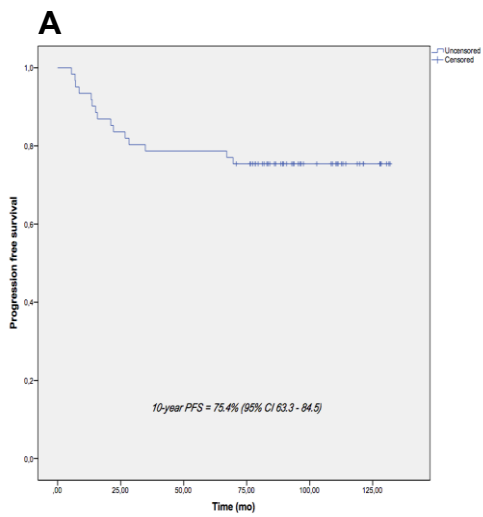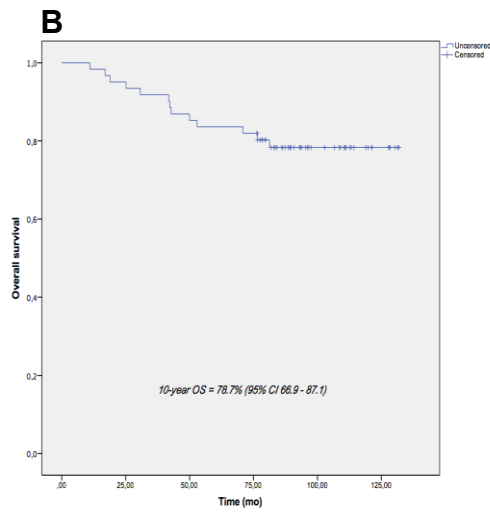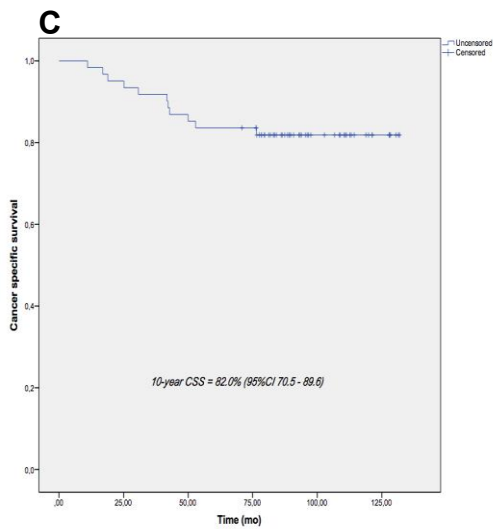

**Supplemental Figure 2** Kaplan-Meier curves for Progression free survival (A), Overall survival (B) and Cancer specific survival (C).

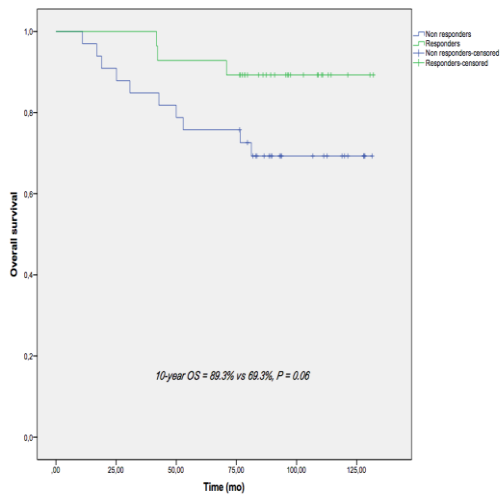

**Supplemental Figure 3** Kaplan-Meier curve for Overall survival according to metabolic response

**Supplemental Table 1** Pathological findings in relation to metabolic responder,

| <b>Pathological Results*</b> | <b>ΔTLG-early ≥ 59.5%</b><br><b>n=30</b> | <b>ΔTLG-early &lt; 59.5%</b><br><b>n=30</b> | <b>p<sup>†</sup> value</b> |
|------------------------------|------------------------------------------|---------------------------------------------|----------------------------|
| TRG1                         | 20                                       | 5                                           |                            |
| TRG2-4                       | 10                                       | 25                                          | <b>0.000086</b>            |
| ypT0N0                       | 16                                       | 5                                           |                            |
| ypT1-4 or N1-2               | 14                                       | 25                                          | <b>0.003</b>               |
| ypT0-2                       | 29                                       | 23                                          |                            |
| ypT3-4                       | 1                                        | 7                                           | <b>0.02</b>                |
| ypN0                         | 23                                       | 19                                          |                            |
| ypN1-2                       | 7                                        | 11                                          | 0.26                       |
| yCRM+                        | 0                                        | 2                                           |                            |
| yCRM-                        | 30                                       | 28                                          | 0.15                       |

\*one patient with tumor T4N0 refused surgery; †Chi-square test;

yCRM+= circumferential resection margin ≤ 1 mm;

yCRM-= circumferential resection margin > 1 mm;

**Supplemental Table 2** Univariate and multivariate analysis of prognostic factors for OS

| Variables                                                | Univariate Analysis |             |         | Multivariate Analysis |        |         |
|----------------------------------------------------------|---------------------|-------------|---------|-----------------------|--------|---------|
|                                                          | HR                  | 95% IC      | P value | HR                    | 95% IC | P value |
| <b>Presurgical</b>                                       |                     |             |         |                       |        |         |
| Sex<br>(Male vs Female)                                  | 1.02                | 0.33 – 3.11 | 0.97    |                       |        |         |
| Age<br>(≤65 vs > 65)                                     | 0.88                | 0.29 – 2.62 | 0.81    |                       |        |         |
| ECOG performance status<br>(0 vs 1-2)                    | 0.68                | 0.23 – 2.04 | 0.49    |                       |        |         |
| Gunderson risk<br>(Intermediate/Moderate vs High)        | 0.39                | 0.10 – 1.41 | 0.13    |                       |        |         |
| Distance from the anal verge<br>(> 5 cm vs ≤ 5 cm)       | 0.51                | 0.16 – 1.68 | 0.26    |                       |        |         |
| Distance of Mesorectal Fascia (MRF)<br>(> 2 mm vs ≤2 mm) | 0.49                | 0.15 – 1.60 | 0.23    |                       |        |         |
| Baseline CEA serum level<br>(≤ 5 UI/L vs > 5 UI/L)       | 0.95                | 0.31 – 2.91 | 0.93    |                       |        |         |
| ΔTLG-early %<br>(≥ 59.5 vs < 59.5)                       | 0.31                | 0.09 – 1.15 | 0.06    |                       |        |         |
| <b>Postsurgical</b>                                      |                     |             |         |                       |        |         |
| TRG<br>(1 vs 2-4 or M1)                                  | 0.31                | 0.07 – 1.44 | 0.11    |                       |        |         |
| ypTNM<br>(T0N0M0 vs T1-4 and/or N+ or M1)                | 0.44                | 0.09 – 2.01 | 0.27    |                       |        |         |

Analysis for yCRM was not done because only 2 cases had a margin positive (≤ 1 mm)
